# Supplementary material for: Trichosporon asahii PLA2 Gene Enhances Drug Resistance to Azoles by Improving Drug Efflux and Biofilm Formation
Source: MDPI journal article supplement (doi:10.3390/ijms24108855), 2023-05-16
Supplement: s1 [file s1]

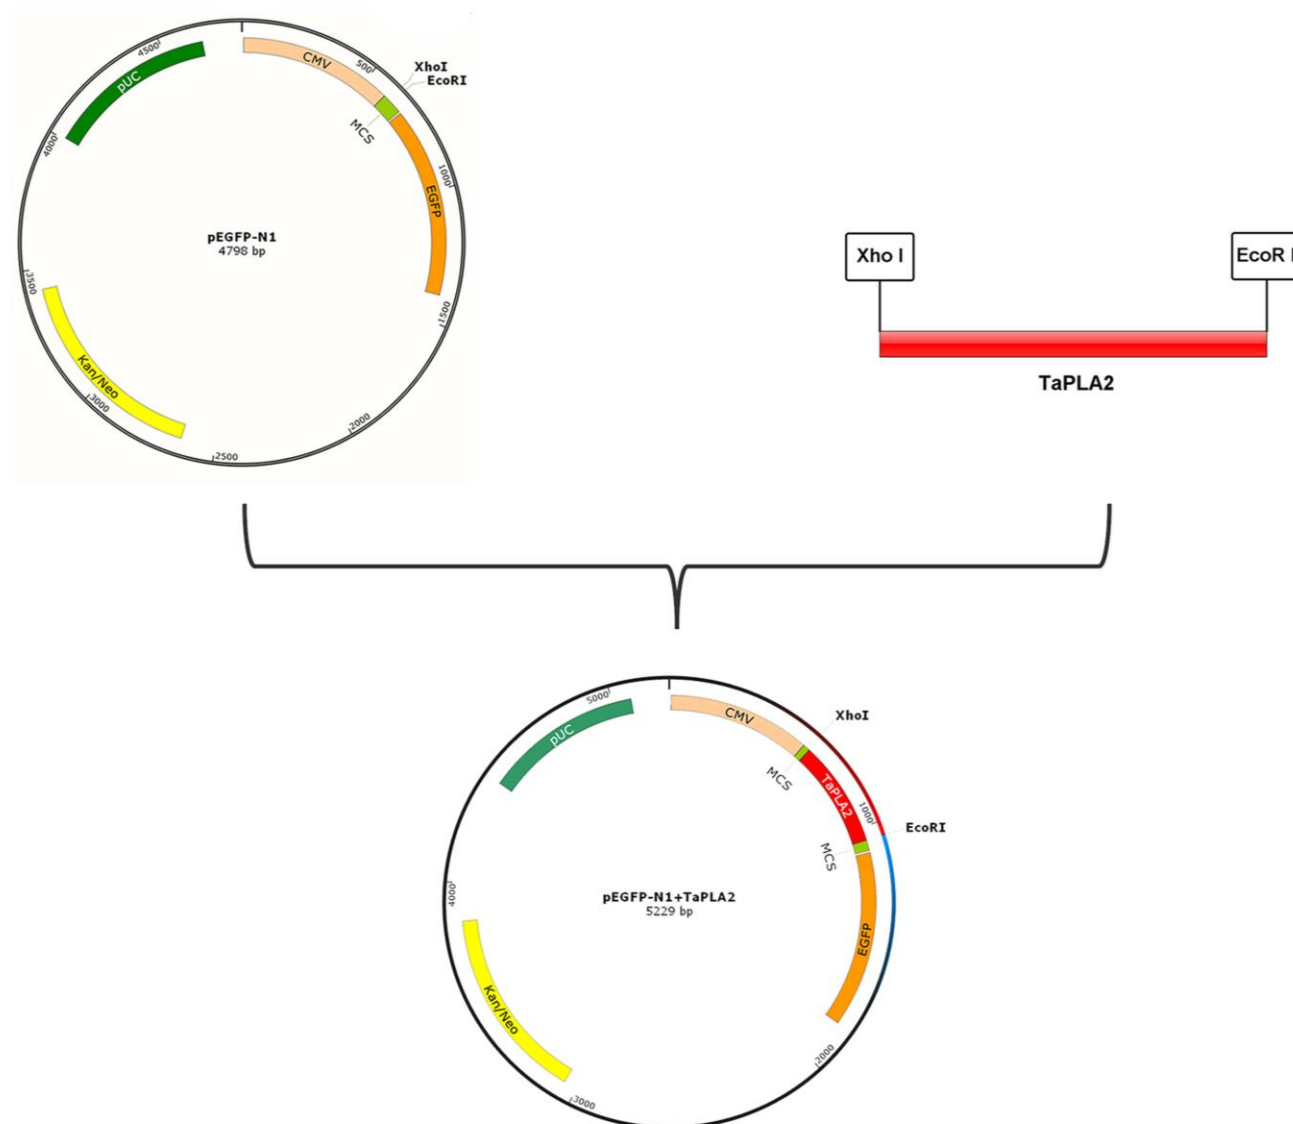

**Figure S1.** Construction of technical route used for *T. asahii* recombinant plasmids. The pEGFP-N1-TaPLA2 plasmid was used to construct the overexpressed TaPLA2 gene strain.

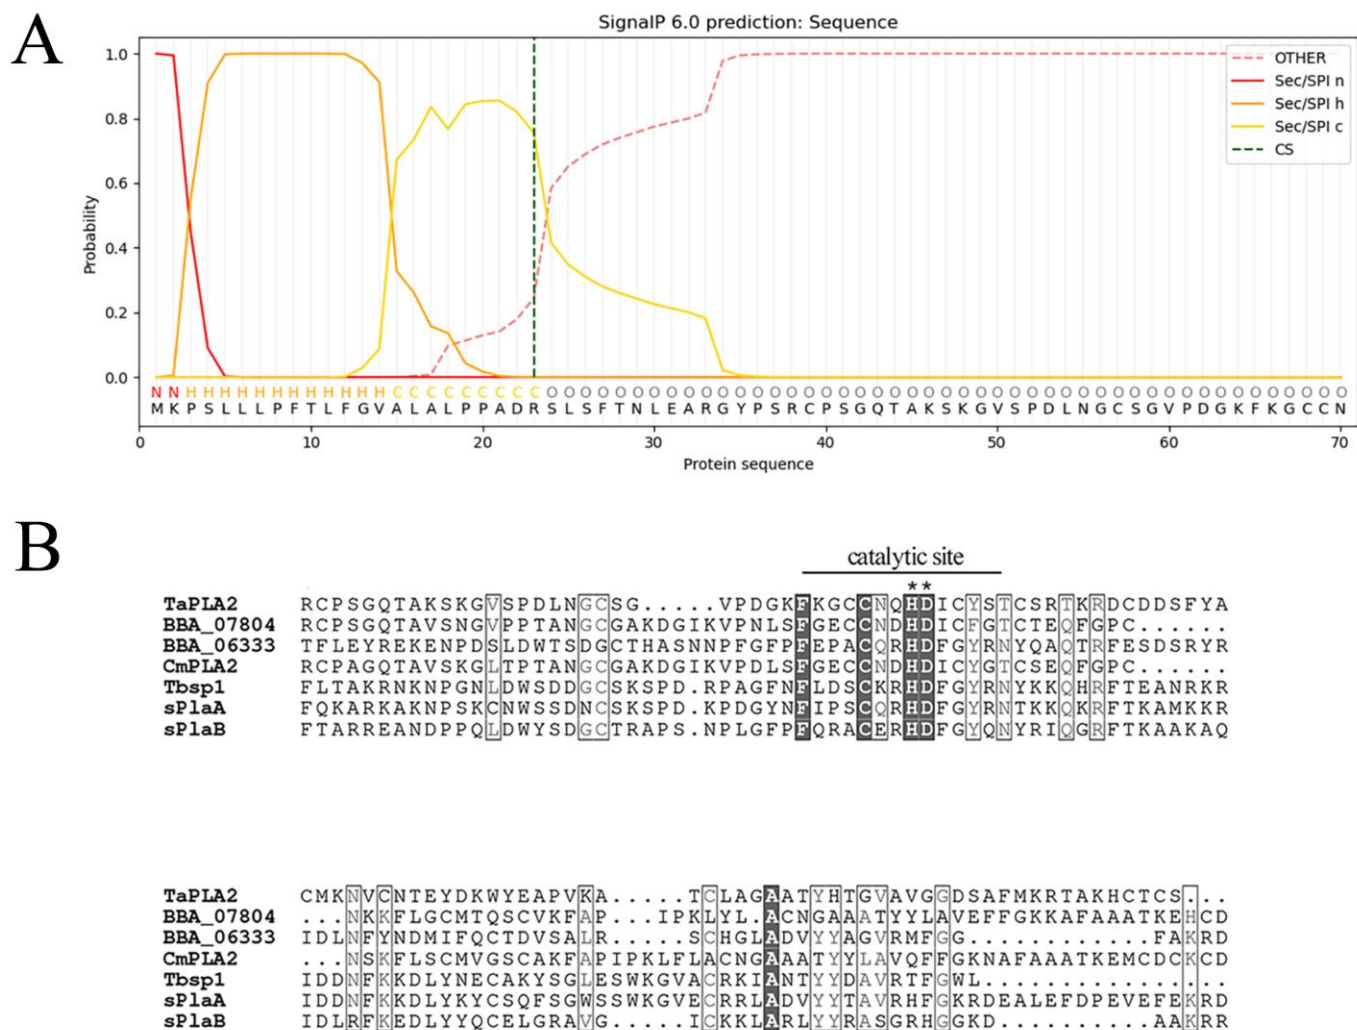

**Figure S2.** (A) Signal peptide of TaPLA2, which was predicted to contain a signal peptide at positions 1 to 23, with the signal peptide sequence MKPSLLL PFTLFGVALALPPADR. (B) Alignment of the conserved domains of PLA2 amino acid sequences from different fungal species, as indicated, which contains the typical  $\text{Ca}^{2+}$  binding and catalytic site C-C-x-x-H-x-C-C motif, the conserved His/Asp dimer (HD), and a potential disulfide bond.

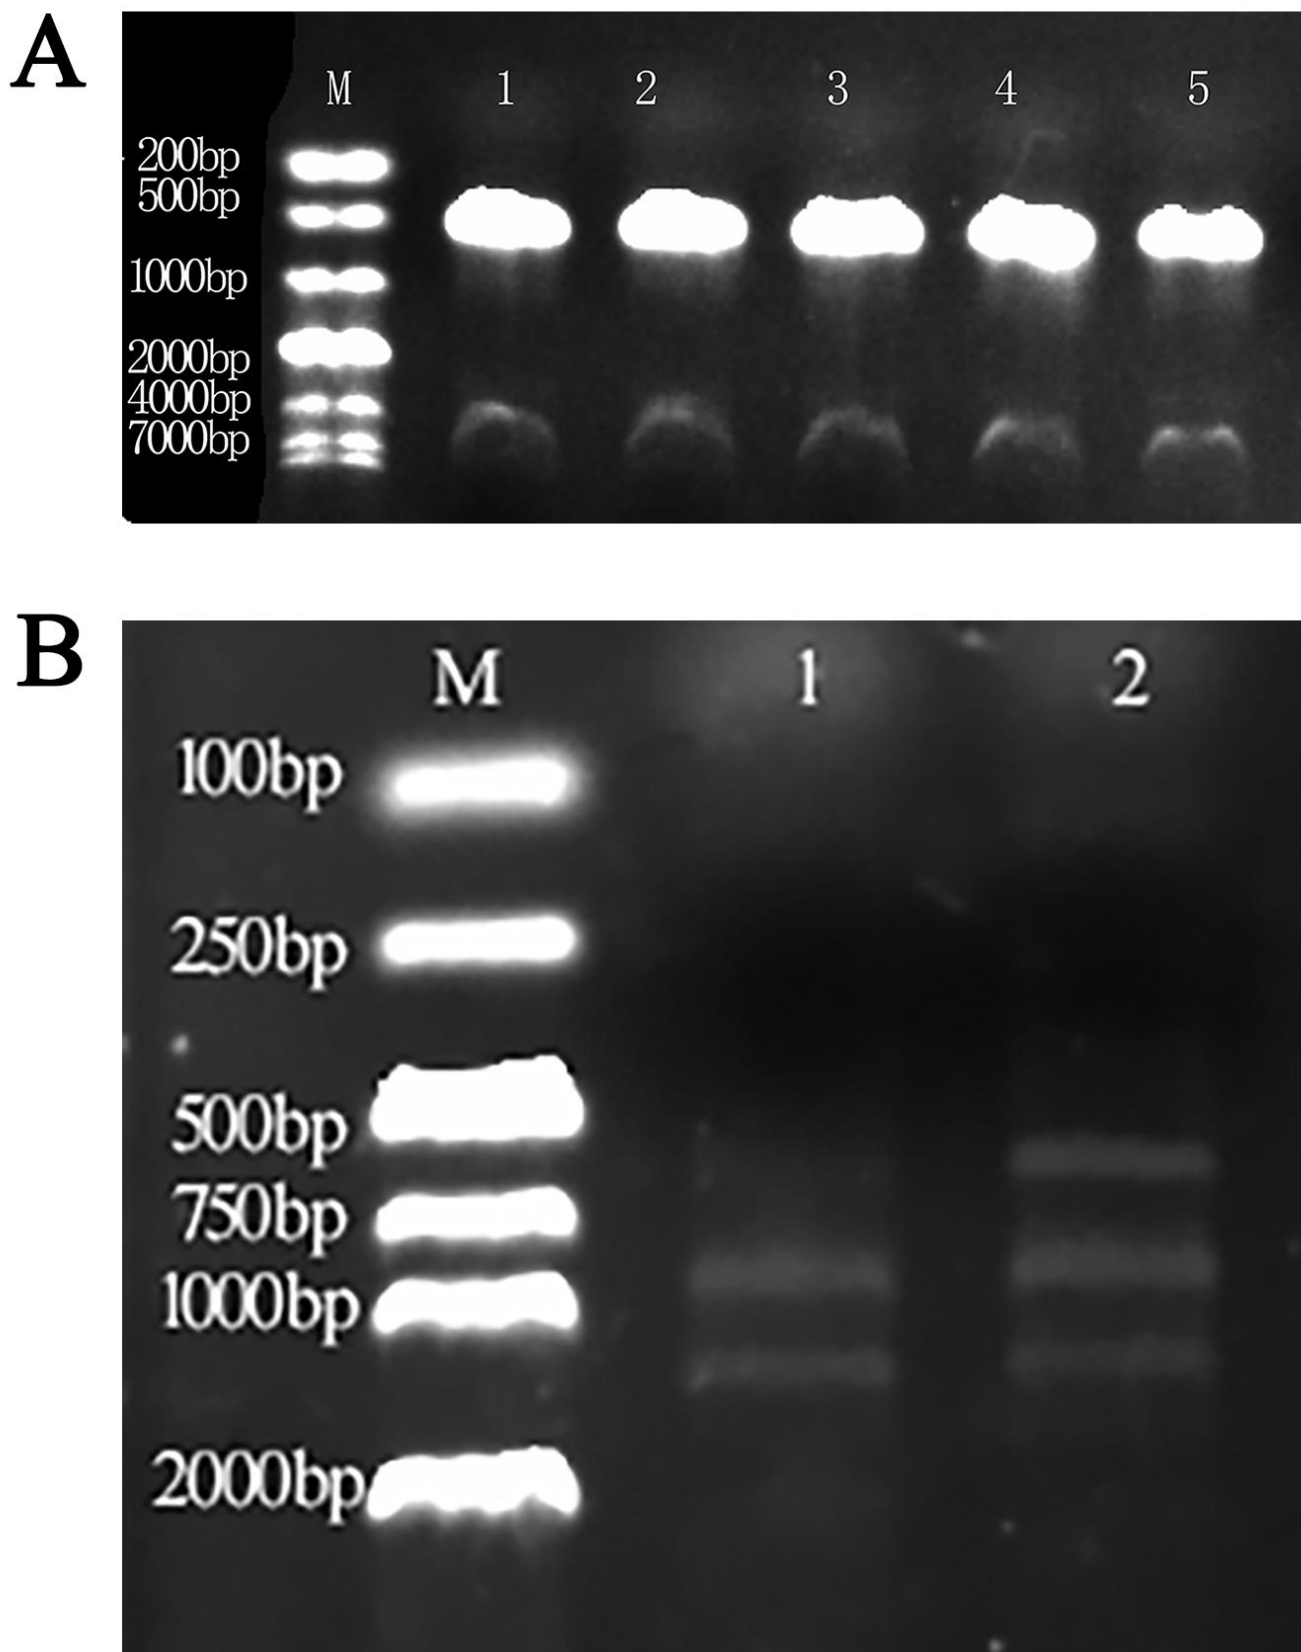

**Figure S3.** (A) PCR verification of pEGFP-N1-TaPLA2 recombinant plasmid. M is the DL10000 DNA marker. Lanes 1–5 show PCR production of the TaPLA2 gene (approximately 500 bp) and the liner plasmid (approximately 4000 bp). (B) EGFP tag verified by PCR. M is the DL2000 DNA marker; Lanes 1 and 2 show results for YAN0802 and the TaPLA2<sup>OE</sup> mutant, respectively.

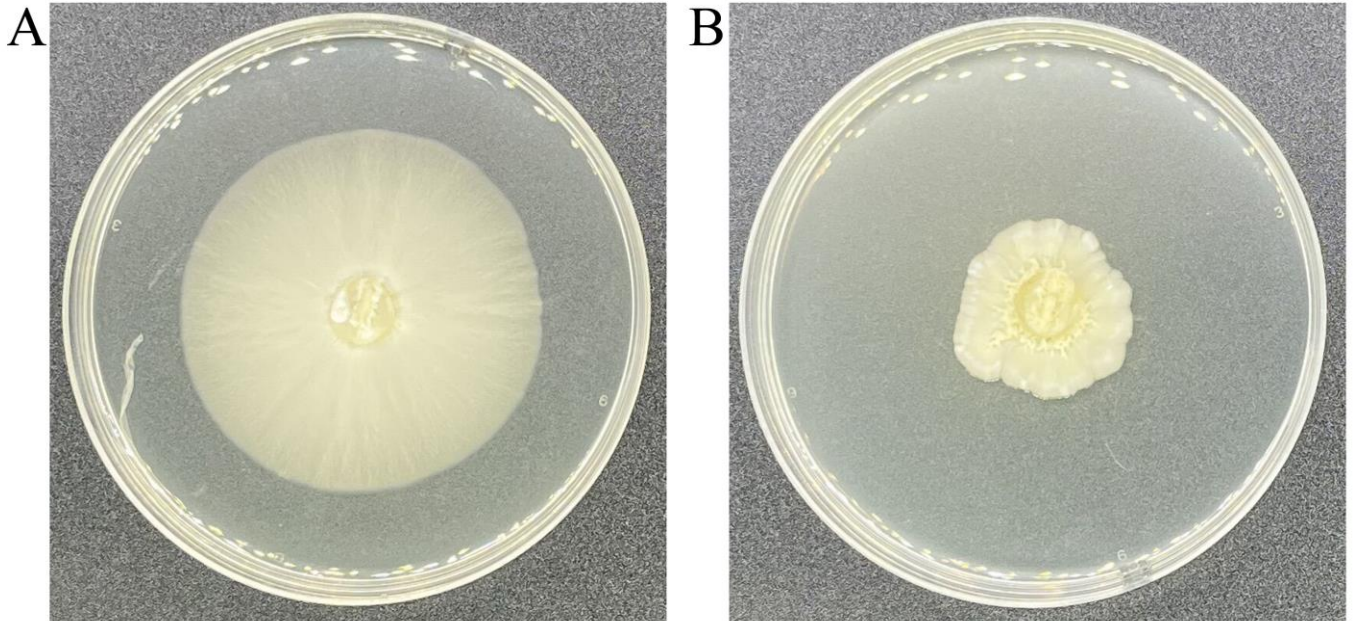

**Figure S4.** Growth phenotypes of wild strain YAN0802 and overexpressed mutant TaPLA2<sup>OE</sup>. (A) YAN0802 colony is large, transparent, and round with long mycelium. (B) TaPLA2<sup>OE</sup> colony is opaque with irregular edges and short hypha.

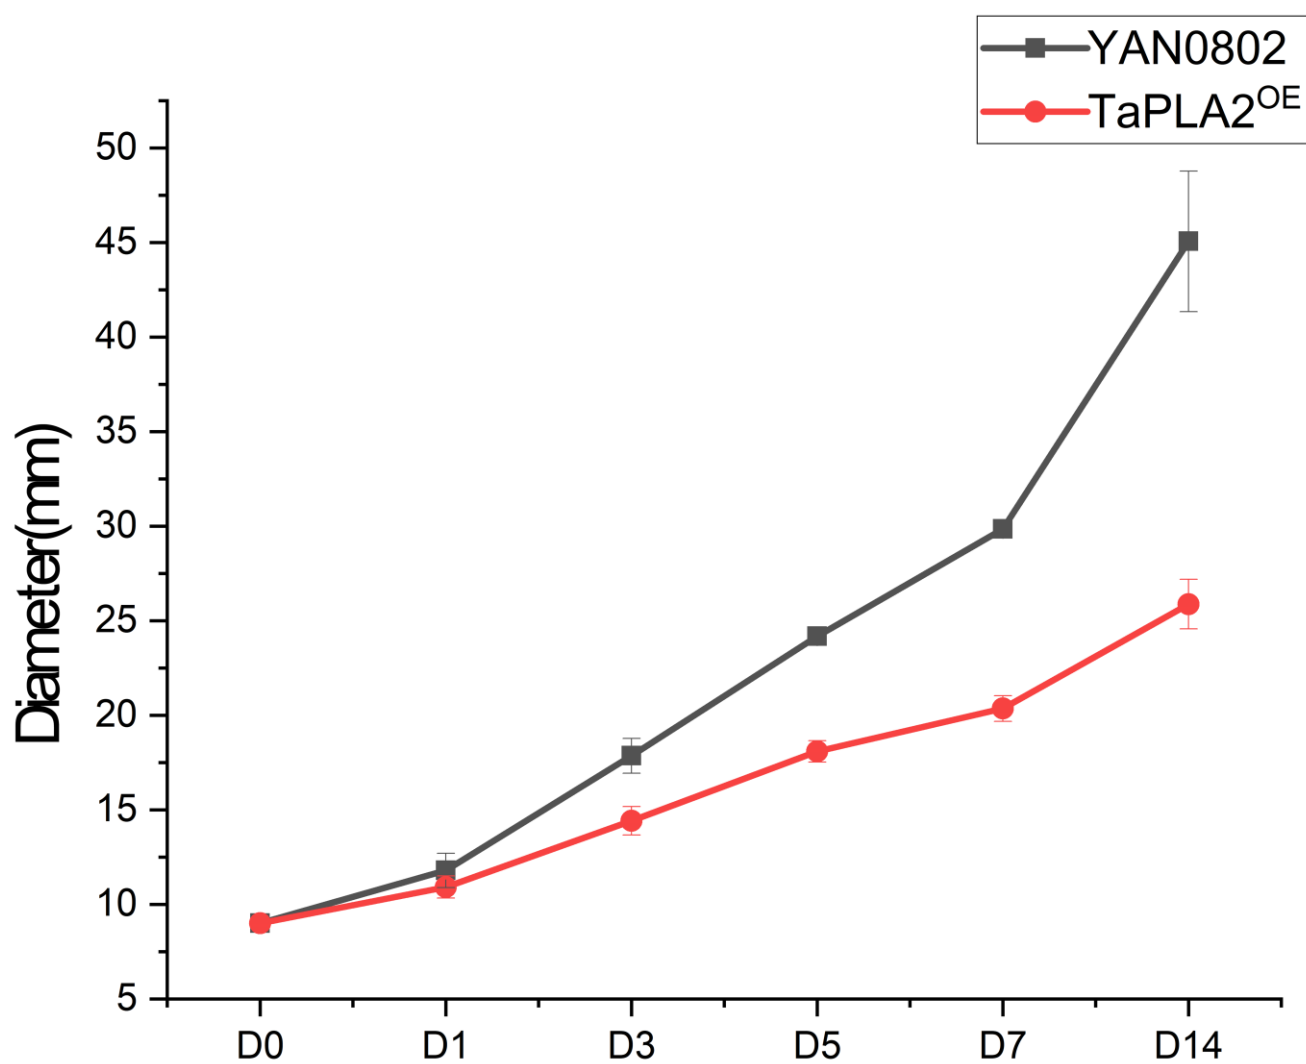

**Figure S5.** The growth curves of wild YAN0802 and TaPLA2<sup>OE</sup> mutant.

**Table S1.** Primers used to construct the overexpressed strain.

| Primers                              | Nucleic Acid Sequence (5' to 3')                                                                                 |
|--------------------------------------|------------------------------------------------------------------------------------------------------------------|
| TaPLA2 for cloning                   |                                                                                                                  |
| PLA2                                 | F: CGGCAACAGTTCACCATGAAGCCCT<br>R: GCATGCCCACCTAGGAGCAGGTACA                                                     |
| Primers were linked by homology arms |                                                                                                                  |
| TY                                   | F: CTACCGGACTCAGAT CTCGAG<br>ATGAAGCCCTCCCTTCTCCTCCCCT<br>R: GTACCGTCGACTGCA GAATTC<br>CTAGGAGCAGGTACAGTGCTTCGCG |
| Validation of recombinant plasmids   |                                                                                                                  |
| CMV-F                                | CGCAAATGGGCGGTAGGCGTG                                                                                            |
| PLA2-R                               | GCATGCCCACCTAGGAGCAGGTACA                                                                                        |
| Primers for EGFP amplification       |                                                                                                                  |
| EGFP                                 | F: CTGGTCGAGCTGGACGGCGACG<br>R: CACGAACTCCAGCAGGACCATG                                                           |
| Primers for RT-PCR                   |                                                                                                                  |
| YG                                   | F: GGCAAGTTCAAAGGCTGCTG<br>R: CACATTCTTCATGCACGCGT                                                               |
| 18s rRNA                             | F: TCTTTCTTGATTTTGTGGGTGG<br>R: TCGATAGTCCCTCTAAGAAGTG                                                           |

**Table S2.** Primers for genes involved in efflux pumps.

| Primers                                   | Nucleic Acid Sequence (5' to 3')                   |
|-------------------------------------------|----------------------------------------------------|
| Primers for ATP-binding cassette (ABC)    |                                                    |
| Transporters                              |                                                    |
| CDR4                                      | F: ACGACCTCAGGCCTGTATCT<br>R: GGCGAGGATTACGGTACTGG |
| PDR11p                                    | F: TGCAGGCCTTCTTCATGGAG<br>R: CCAGACCAGGTGAAGGGAAC |
| ABC-T                                     | F: CAAGGTCGGATTGGAGGGAC<br>R: TGATGTCTGCGCCATCCTTT |
| CDR1                                      | F: TTTGACGATGTGGGGAGTGG<br>R: GTACGCAATGACGAAACCGG |
| Primers for Major Facilitator Superfamily |                                                    |
| (MFS) transporters                        |                                                    |
| FUB11                                     | F: GCCGGTGTTTTTGGCTGTAG<br>R: GCATGGGCTCATACGTCTCA |
| MTP                                       | F: CCGTTTCCTCGCTGGATTCT<br>R: CGAAGATGGCAATGGCGAAG |
| MDR                                       | F: CTTCTCTGGGCTCCTGCTTC<br>R: AGAGGGGACGATCCGAAGAA |

**Table S3.** Primers for genes involved in cell-wall integrity.

| Primers                                         | Nucleic Acid Sequence (5' to 3')                   |
|-------------------------------------------------|----------------------------------------------------|
| Chitin synthesis or degradation of gene primers |                                                    |
| CHSe                                            | F: CTACCTCGTGTACCCCCTCA<br>R: TACGACGTAGAAGCCGATGC |
| CHS1                                            | F: ACCAGTTCTACCACACGCAG<br>R: ACGAAACATCCTGGCGTCAT |
| CHS3                                            | F: TGTACTCGCTCGACTCTGGA<br>R: TCATTGGCGTGAATCCCGAA |
| CHS5                                            | F: ATCCAACCACCAACGCTCAT<br>R: GACGAGCAAACAAAGTGCCT |
| CHT1                                            | F: CCTACCCCGACAACAAGGAC<br>R: AATGTAGAAGTGGGTGGCGG |
| CHT2                                            | F: GTGGACTCACGACACTGAGG<br>R: GAGGATGAGAGCAGGCTTGG |
| CHT3                                            | F: TCCCCAGGGCTTTGTGATTC<br>R: CCAGTCGATCTCGCTTACCC |
| Cell wall synthesis-related primers             |                                                    |
| GPI                                             | F: CGGATATTGCGGATGGGCT<br>R: CCAGACGACTTGGGCTTGT   |
| ALS                                             | F: TCAGACAAGATGCACCGTCC<br>R: TGAGGAGGTGACGCTTGAAC |
| HOG-MAPK signaling pathway primer               |                                                    |
| HOG1                                            | F: CTCGTCCGAATAGCCCTGAC<br>R: TCGTGACGGAGGTGCTTTAG |
| MAPK                                            | F: CATTCACTCTGCGAACGTGC<br>R: CTGCTCAGTCTGTACCTGCC |
